# Supplementary material
Source: PubMed Central journal article supplement (PMC6509494)
Supplement: supp_RA118.006628_141832_2_supp_291963_pn5nd4.pdf [file supp_RA118.006628_141832_2_supp_291963_pn5nd4.pdf]

## Supplementary Information

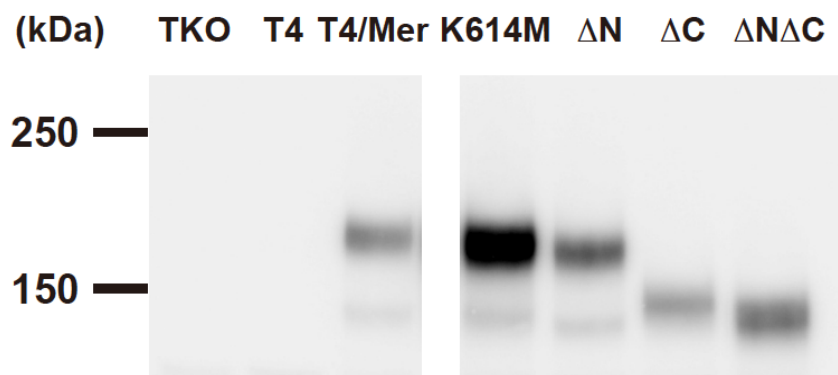

**Figure S1. Establishment of TKO transformants expressing MerTK or its mutants with Tim4.** TKO cells were transformed with wild-type MerTK or its indicated mutant (K614M, ΔN, ΔC, or ΔNΔC), together with Tim4. The expression of MerTK was analyzed by western blotting with anti-MerTK.

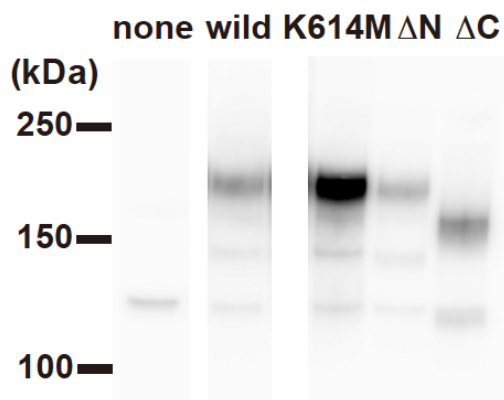

**Figure S2. Establishment of Ba/F3 cell transformants expressing wild-type or mutant MerTKs.** Mouse Ba/F3 cells expressing mouse Tim4 were transformed by wild-type or the indicated MerTK mutants (ΔN, ΔC, or K614F). Cell lysates were prepared from  $1.0 \times 10^6$  cells, and a one-tenth volume of each lysate was used to analyze the MerTK expression by western blotting.
